# Supplementary material for: Thermal limits of wild and laboratory strains of two African malaria vector species, Anopheles arabiensis and Anopheles funestus
Source: PubMed Central journal article supplement (PMC3507762; doi:10.1186/1475-2875-11-226), 2012-07-06
Supplement: 1475-2875-11-226-S1.pdf [file 1475-2875-11-226-S1.pdf]

Additional file 1. Results from a Shapiro-Wilks test for normality and Levene's test for homogeneity of variance for all groups and each group separately for *Anopheles arabiensis* and *Anopheles funestus*.

| <b>Species and trait</b>            | <b>Group</b>      | <b>Shapiro-Wilks</b> | <b>Group</b> | <b>df</b> | <b>Levene's</b>       |
|-------------------------------------|-------------------|----------------------|--------------|-----------|-----------------------|
| <i>An. arabiensis</i><br>CTmin (°C) | ALL               | W = 0.99, P = 0.009  | ALL          | 678       | F = 3.64, P < 0.0001  |
|                                     | Laboratory strain | W = 0.98, P < 0.0001 | Strain       | 712       | F = 0.52, P = 0.4701  |
|                                     | Wild strain       | W = 0.97, P < 0.0001 |              |           |                       |
|                                     | Males             | W = 0.99, P = 0.1285 | Sex          | 712       | F = 0.64, P = 0.4248  |
|                                     | Females           | W = 0.99, P = 0.0031 |              |           |                       |
|                                     | 20°C acclimation  | W = 0.95, P < 0.0001 | Acclimation  | 711       | F = 28.17, P < 0.0001 |
|                                     | 25°C acclimation  | W = 0.98, P = 0.0038 |              |           |                       |
|                                     | 30°C acclimation  | W = 0.98, P = 0.0016 |              |           |                       |
|                                     | 10 day olds       | W = 0.97, P = 0.0001 | Age          | 486       | F = 14.71, P = 0.0001 |
|                                     | 15 day olds       | W = 0.98, P = 0.0041 |              |           |                       |
| <i>An. funestus</i><br>CTmin (°C)   | ALL               | W = 0.99, P = 0.0001 | ALL          | 498       | F = 3.51, P < 0.0001  |
|                                     | Laboratory strain | W = 0.95, P < 0.0001 | Strain       | 520       | F = 37.39, P < 0.0001 |
|                                     | Wild strain       | W = 0.98, P = 0.0052 |              |           |                       |
|                                     | Males             | W = 0.99, P = 0.0340 | Sex          | 520       | F = 0.03, P = 0.8723  |
|                                     | Females           | W = 0.98, P = 0.0009 |              |           |                       |
|                                     | 20°C acclimation  | W = 0.97, P = 0.0008 | Acclimation  | 519       | F = 39.68, P < 0.0001 |
|                                     | 25°C acclimation  | W = 0.99, P = 0.2272 |              |           |                       |
|                                     | 30°C acclimation  | W = 0.99, P = 0.1657 |              |           |                       |
|                                     | 10 day olds       | W = 0.95, P < 0.0001 | Age          | 520       | F = 0.28, P = 0.5947  |
|                                     | 20 day olds       | W = 0.97, P = 0.0002 |              |           |                       |
| <i>An. arabiensis</i><br>CTmax (°C) | ALL               | W = 0.90, P < 0.0001 | ALL          | 500       | F = 7.24, P < 0.0001  |
|                                     | Laboratory strain | W = 0.92, P < 0.0001 | Strain       | 522       | F = 3.21, P = 0.0736  |
|                                     | Wild strain       | W = 0.86, P < 0.0001 |              |           |                       |
|                                     | Males             | W = 0.93, P < 0.0001 | Sex          | 522       | F = 72.28, P < 0.0001 |
|                                     | Females           | W = 0.93, P < 0.0001 |              |           |                       |
|                                     | 20°C acclimation  | W = 0.89, P < 0.0001 | Acclimation  | 521       | F = 2.65, P = 0.0716  |
|                                     | 25°C acclimation  | W = 0.93, P < 0.0001 |              |           |                       |
|                                     | 30°C acclimation  | W = 0.84, P < 0.0001 |              |           |                       |
|                                     | 10 day olds       | W = 0.87, P < 0.0001 | Age          | 522       | F = 4.72, P = 0.0302  |
|                                     | 15 day olds       | W = 0.92, P < 0.0001 |              |           |                       |
| <i>An. funestus</i><br>CTmax (°C)   | ALL               | W = 0.88, P < 0.0001 | ALL          | 516       | F = 5.01, P < 0.0001  |
|                                     | Laboratory strain | W = 0.96, P < 0.0001 | Strain       | 538       | F = 1.42, P = 0.2339  |
|                                     | Wild strain       | W = 0.81, P < 0.0001 |              |           |                       |
|                                     | Males             | W = 0.97, P < 0.0001 | Sex          | 538       | F = 0.00, P = 0.9958  |
|                                     | Females           | W = 0.77, P < 0.0001 |              |           |                       |
|                                     | 20°C acclimation  | W = 0.69, P < 0.0001 | Acclimation  | 537       | F = 1.08, P = 0.3402  |
|                                     | 25°C acclimation  | W = 0.97, P < 0.0001 |              |           |                       |
|                                     | 30°C acclimation  | W = 0.96, P < 0.0001 |              |           |                       |
|                                     | 10 day olds       | W = 0.98, P = 0.0030 | Age          | 538       | F = 15.72, P < 0.0001 |
|                                     | 20 day olds       | W = 0.84, P < 0.0001 |              |           |                       |

|                       |                       |                    |             |     |                       |
|-----------------------|-----------------------|--------------------|-------------|-----|-----------------------|
| <i>An. arabiensis</i> |                       |                    |             |     |                       |
| CTmin (°C)            | ALL                   | W=0.98, P < 0.0001 | ALL         | 342 | F = 5.75, P < 0.0001  |
| Laboratory strain     | Males                 | W=0.95, P < 0.0001 | Sex         | 358 | F = 0.33, P = 5673    |
|                       | Females               | W=0.98, P = 0.0029 |             |     |                       |
|                       | 20°C acclimation      | W=0.94, P < 0.0001 | Acclimation | 357 | F = 9.65, P < 0.0001  |
|                       | 25°C acclimation      | W=0.98, P = 0.0705 |             |     |                       |
|                       | 30°C acclimation      | W=0.94, P < 0.0001 |             |     |                       |
|                       | 10 day olds           | W=0.97, P = 0.0124 | Age         | 357 | F = 17.81, P < 0.0001 |
|                       | 15 day olds           | W=0.92, P < 0.0001 |             |     |                       |
|                       | 20 day olds           | W=0.87, P < 0.0001 |             |     |                       |
| <i>An. funestus</i>   |                       |                    |             |     |                       |
| CTmin (°C)            | ALL                   | W=0.94, P < 0.0001 | ALL         | 392 | F=3.67, P < 0.0001    |
| Laboratory strain     | Males                 | W=0.95, P < 0.0001 | Sex         | 408 | F=0.66, P = 0.4158    |
|                       | Females               | W=0.90, P < 0.0001 |             |     |                       |
|                       | 20°C acclimation      | W=0.91, P < 0.0001 | Acclimation | 407 | F=64.83, P < 0.0001   |
|                       | 25°C acclimation      | W=0.98, P = 0.1214 |             |     |                       |
|                       | 30°C acclimation      | W=0.96, P = 0.0002 |             |     |                       |
|                       | 10 day olds           | W=0.93, P < 0.0001 | Age         | 407 | F=31.57, P < 0.0001   |
|                       | 20 day olds           | W=0.97, P = 0.0068 |             |     |                       |
|                       | 30 day olds           | W=0.97, P = 0.0117 |             |     |                       |
| <i>An. arabiensis</i> |                       |                    |             |     |                       |
| CTmin (°C)            | ALL                   | W=0.98, P < 0.0010 | ALL         | 236 | F=0.94, P = 0.5054    |
| Wild strain           | Males                 | W=0.99, P = 0.2095 | Sex         | 246 | F=8.04, P = 0.0050    |
|                       | Females               | W=0.97, P = 0.0033 |             |     |                       |
|                       | 20°C acclimation      | W=0.96, P = 0.0123 | Acclimation | 245 | F=4.95, P = 0.0078    |
|                       | 25°C acclimation      | W=0.96, P = 0.0107 |             |     |                       |
|                       | 30°C acclimation      | W=0.97, P = 0.0274 |             |     |                       |
|                       | 10 day olds           | W=0.96, P = 0.0018 | Age         | 246 | F=0.05, P = 0.8198    |
|                       | 15 day olds           | W=0.97, P = 0.0136 |             |     |                       |
|                       | <i>An. funestus</i>   |                    |             |     |                       |
| CTmin (°C)            | ALL                   | W=0.98, P = 0.0052 | ALL         | 220 | F=1.82, P = 0.0524    |
| Wild strain           | Males                 | W=0.96, P = 0.0059 | Sex         | 230 | F=0.19, P = 0.6583    |
|                       | Females               | W=0.98, P = 0.1319 |             |     |                       |
|                       | 20°C acclimation      | W=0.98, P = 0.2028 | Acclimation | 229 | F=1.48, P = 0.2296    |
|                       | 25°C acclimation      | W=0.98, P = 0.4414 |             |     |                       |
|                       | 30°C acclimation      | W=0.97, P = 0.1358 |             |     |                       |
|                       | 10 day olds           | W=0.95, P = 0.0005 | Age         | 230 | F=9.94, P = 0.0018    |
|                       | 20 day olds           | W=0.99, P=0.6761   |             |     |                       |
|                       | <i>An. arabiensis</i> |                    |             |     |                       |
| CTmax (°C)            | ALL                   | W=0.93, P < 0.0001 | ALL         | 423 | F=4.12, P < 0.0001    |
| Laboratory strain     | Males                 | W=0.95, P < 0.0001 | Sex         | 439 | F=41.99, P < 0.0001   |
|                       | Females               | W=0.95, P < 0.0001 |             |     |                       |
|                       | 20°C acclimation      | W=0.92, P < 0.0001 | Acclimation | 438 | F=0.84, P = 0.4309    |
|                       | 25°C acclimation      | W=0.93, P < 0.0001 |             |     |                       |
|                       | 30°C acclimation      | W=0.92, P < 0.0001 |             |     |                       |
|                       | 10 day olds           | W=0.89, P < 0.0001 | Age         | 438 | F=2.75, P = 0.0653    |

|                       |                  |                    |             |     |                     |
|-----------------------|------------------|--------------------|-------------|-----|---------------------|
|                       | 15 day olds      | W=0.94, P < 0.0001 |             |     |                     |
|                       | 20 day olds      | W=0.94, P < 0.0001 |             |     |                     |
| <hr/>                 |                  |                    |             |     |                     |
| <i>An. funestus</i>   |                  |                    |             |     |                     |
| CTmax (°C)            | ALL              | W=0.94, P < 0.0001 | ALL         | 372 | F=2.95, P < 0.0001  |
| Laboratory strain     | Males            | W=0.89, P < 0.0001 | Sex         | 388 | F=6.73, P = 0.0098  |
|                       | Females          | W=0.98, P < 0.0072 |             |     |                     |
|                       | 20°C acclimation | W=0.82, P < 0.0001 | Acclimation | 387 | F=0.72, P = 0.4861  |
|                       | 25°C acclimation | W=0.95, P = 0.0003 |             |     |                     |
|                       | 30°C acclimation | W=0.97, P = 0.0009 |             |     |                     |
|                       | 10 day olds      | W=0.98, P = 0.0269 | Age         | 387 | F=7.75, P = 0.0005  |
|                       | 20 day olds      | W=0.96, P = 0.0010 |             |     |                     |
|                       | 30 day olds      | W=0.88, P < 0.0001 |             |     |                     |
| <hr/>                 |                  |                    |             |     |                     |
| <i>An. arabiensis</i> |                  |                    |             |     |                     |
| CTmax (°C)            | ALL              | W=0.85, P < 0.0001 | ALL         | 232 | F=7.36, P < 0.0001  |
| Wild strain           | Males            | W=0.91, P < 0.0001 | Sex         | 242 | F=42.20, P < 0.0001 |
|                       | Females          | W=0.83, P < 0.0001 |             |     |                     |
|                       | 20°C acclimation | W=0.82, P < 0.0001 | Acclimation | 241 | F=13.58, P < 0.0001 |
|                       | 25°C acclimation | W=0.92, P < 0.0010 |             |     |                     |
|                       | 30°C acclimation | W=0.84, P < 0.0001 |             |     |                     |
|                       | 10 day olds      | W=0.80, P < 0.0001 | Age         | 242 | F=0.38, P = 0.5382  |
|                       | 15 day olds      | W=0.88, P < 0.0001 |             |     |                     |
| <hr/>                 |                  |                    |             |     |                     |
| <i>An. funestus</i>   |                  |                    |             |     |                     |
| CTmax (°C)            | ALL              | W=0.81, P < 0.0001 | ALL         | 258 | F=5.97, P < 0.0001  |
| Wild strain           | Males            | W=0.97, P = 0.0070 | Sex         | 268 | F=0.76, P = 0.3835  |
|                       | Females          | W=0.69, P < 0.0001 |             |     |                     |
|                       | 20°C acclimation | W=0.97, P = 0.0040 | Acclimation | 267 | F=6.24, P = 0.0023  |
|                       | 25°C acclimation | W=0.63, P < 0.0001 |             |     |                     |
|                       | 30°C acclimation | W=0.97, P = 0.0861 |             |     |                     |
|                       | 10 day olds      | W=0.97, P = 0.0166 | Age         | 268 | F=5.04, P = 0.0257  |
|                       | 20 day olds      | W=0.73, P < 0.0001 |             |     |                     |
| <hr/>                 |                  |                    |             |     |                     |
