# Supplementary material for: Thermal limits of wild and laboratory strains of two African malaria vector species, Anopheles arabiensis and Anopheles funestus
Source: PubMed Central journal article supplement (PMC3507762; doi:10.1186/1475-2875-11-226), 2012-07-06
Supplement: 1475-2875-11-226-S2.pdf [file 1475-2875-11-226-S2.pdf]

Additional file 2. Percentage deviation from the mean critical thermal minimum (CTmin) and maximum (CTmax) per group, per strain for *Anopheles funestus* and *Anopheles arabiensis*.

| <b>Strain and CT</b>                           | <b>Group</b>     | <b>Mean CT (°C)</b> | <b>% Deviation</b> |
|------------------------------------------------|------------------|---------------------|--------------------|
| <i>An. funestus</i> both strains<br>CTmax (°C) | 10 day olds      | 40.5                | 1.0                |
|                                                | 20 day olds      | 39.7                | -1.0               |
|                                                | Males            | 39.7                | -1.0               |
|                                                | Females          | 40.4                | 0.7                |
|                                                | 20°C acclimation | 39.6                | -1.2               |
|                                                | 25°C acclimation | 40                  | -0.2               |
|                                                | 30°C acclimation | 40.6                | 1.2                |
|                                                | wild             | 39.8                | -0.7               |
|                                                | Lab              | 40.3                | 0.5                |
| <i>An. funestus</i> both strains<br>CTmin (°C) | 10 day olds      | 8                   | -8.0               |
|                                                | 20 day olds      | 9.1                 | 4.6                |
|                                                | 30 day olds      | 9.1                 | 4.6                |
|                                                | Males            | 9.1                 | 4.6                |
|                                                | Females          | 8.4                 | -3.4               |
|                                                | 20°C acclimation | 8.1                 | -6.9               |
|                                                | 25°C acclimation | 8.5                 | -2.3               |
|                                                | 30°C acclimation | 9.6                 | 10.3               |
|                                                | wild             | 8.2                 | -5.7               |
| Lab                                            | 9.2              | 5.7                 |                    |
| Laboratory <i>An. funestus</i><br>CTmax (°C)   | 10 day olds      | 40.7                | 0.7                |
|                                                | 20 day olds      | 40.1                | -0.7               |
|                                                | 30 day olds      | 40.2                | -0.5               |
|                                                | Males            | 39.7                | -1.7               |
|                                                | Females          | 41                  | 1.5                |
|                                                | 20°C acclimation | 39.8                | -1.5               |
|                                                | 25°C acclimation | 40.5                | 0.2                |
|                                                | 30°C acclimation | 40.8                | 1.0                |
| Wild <i>An. funestus</i><br>CTmax (°C)         | 10 day olds      | 40.2                | 1.0                |
|                                                | 20 day olds      | 39.4                | -1.0               |
|                                                | Males            | 39.6                | -0.5               |
|                                                | Females          | 40                  | 0.5                |
|                                                | 20°C acclimation | 39.3                | -1.3               |
|                                                | 25°C acclimation | 39.5                | -0.8               |
|                                                | 30°C acclimation | 40.6                | 2.0                |
| Laboratory <i>An. funestus</i><br>CTmin (°C)   | 10 day olds      | 7.8                 | -15.2              |
|                                                | 20 day olds      | 10                  | 8.7                |
|                                                | 30 day olds      | 9.7                 | 5.4                |
|                                                | Males            | 9.5                 | 3.3                |
|                                                | Females          | 8.8                 | -4.3               |
|                                                | 20°C acclimation | 8.5                 | -7.6               |
|                                                | 25°C acclimation | 8.8                 | -4.3               |

|                                    |                                    |             |       |
|------------------------------------|------------------------------------|-------------|-------|
|                                    | 30°C acclimation                   | 10.2        | 10.9  |
| Wild <i>An. funestus</i>           | 10 day olds                        | 8.2         | 0.0   |
| CTmin (°C)                         | 20 day olds                        | 8.2         | 0.0   |
|                                    | 30 day olds                        | 8.2         | 0.0   |
|                                    | Males                              | 8.5         | 3.7   |
|                                    | Females                            | 7.9         | -3.7  |
|                                    | 20°C acclimation                   | 7.8         | -4.9  |
|                                    | 25°C acclimation                   | 8.3         | 1.2   |
|                                    | 30°C acclimation                   | 8.8         | 7.3   |
|                                    | <i>An. arabiensis</i> both strains | 10 day olds | 40.1  |
| CTmax (°C)                         | 15 day olds                        | 39.6        | -0.3  |
|                                    | 20 day olds                        | 39.5        | -0.5  |
|                                    | Males                              | 38.9        | -2.0  |
|                                    | Females                            | 40.6        | 2.3   |
|                                    | 20°C acclimation                   | 39.8        | 0.3   |
|                                    | 25°C acclimation                   | 39.3        | -1.0  |
|                                    | 30°C acclimation                   | 40.1        | 1.0   |
|                                    | wild                               | 39.8        | 0.3   |
|                                    | Lab                                | 39.7        | 0.0   |
| <i>An. arabiensis</i> both strains | 10 day olds                        | 9.8         | 0.0   |
| CTmin (°C)                         | 15 day olds                        | 9.6         | -2.0  |
|                                    | 20 day olds                        | 10.1        | 3.1   |
|                                    | Males                              | 10.2        | 4.1   |
|                                    | Females                            | 9.5         | -3.1  |
|                                    | 20°C acclimation                   | 9.1         | -7.1  |
|                                    | 25°C acclimation                   | 10          | 2.0   |
|                                    | 30°C acclimation                   | 10.3        | 5.1   |
|                                    | wild                               | 8.8         | -10.2 |
|                                    | Lab                                | 10.9        | 11.2  |
| Laboratory <i>An. arabiensis</i>   | 10 day olds                        | 40.1        | 1.0   |
| CTmax (°C)                         | 15 day olds                        | 39.5        | -0.5  |
|                                    | 20 day olds                        | 39.5        | -0.5  |
|                                    | Males                              | 38.7        | -2.5  |
|                                    | Females                            | 40.6        | -2.3  |
|                                    | 20°C acclimation                   | 39.7        | 0.0   |
|                                    | 25°C acclimation                   | 39.6        | -0.3  |
|                                    | 30°C acclimation                   | 39.7        | 0.0   |
|                                    | Laboratory <i>An. arabiensis</i>   | 10 day olds | 11.2  |
| CTmin (°C)                         | 15 day olds                        | 10.7        | -1.8  |
|                                    | 20 day olds                        | 10.8        | -0.9  |
|                                    | Males                              | 11.2        | 2.8   |
|                                    | Females                            | 10.5        | -3.7  |
|                                    | 20°C acclimation                   | 10          | -8.3  |
|                                    | 25°C acclimation                   | 11.5        | 5.5   |
|                                    | 30°C acclimation                   | 11.1        | 1.8   |

|                            |                  |      |      |
|----------------------------|------------------|------|------|
| Wild <i>An. arabiensis</i> | 10 day olds      | 40.2 | 1.0  |
| CTmax (°C)                 | 15 day olds      | 39.7 | -0.3 |
|                            | 20 day olds      | 39.5 | -0.8 |
|                            | Males            | 39.1 | -1.8 |
|                            | Females          | 40.5 | 1.8  |
|                            | 20°C acclimation | 40   | 0.5  |
|                            | 25°C acclimation | 39   | -2.0 |
|                            | 30°C acclimation | 40.5 | 1.8  |
|                            | <hr/>            |      |      |
| Wild <i>An. arabiensis</i> | 10 day olds      | 8.5  | -3.4 |
| CTmin (°C)                 | 15 day olds      | 8.5  | -3.4 |
|                            | 20 day olds      | 9.4  | 6.8  |
|                            | Males            | 9.1  | 3.4  |
|                            | Females          | 8.5  | -3.4 |
|                            | 20°C acclimation | 8.3  | -5.7 |
|                            | 25°C acclimation | 8.6  | -2.3 |
|                            | 30°C acclimation | 9.5  | 8.0  |
|                            | <hr/>            |      |      |
